# Supplementary material for: Microbiota-Derived Extracellular Vesicles Promote Immunity and Intestinal Maturation in Suckling Rats
Source: MDPI journal article supplement (doi:10.3390/nu15214701), 2023-11-06
Supplement: s1 [file s1]

**Table S1. Hematological variables.** The results are expressed as mean  $\pm$  SEM (n= 12 animals/group). No statistical differences were observed between groups.

| Intervention time                   | Experimental groups |                     |                    |
|-------------------------------------|---------------------|---------------------|--------------------|
| Day 8                               | CON                 | EcN-EVs             | EcoR12-EVs         |
| Leucocytes ( $\times 10^9/L$ )      | 2.84 $\pm$ 0.17     | 3.35 $\pm$ 0.35     | 2.75 $\pm$ 0.66    |
| Lymphocytes (%)                     | 64.12 $\pm$ 2.06    | 65.21 $\pm$ 2.16    | 64.69 $\pm$ 1.3    |
| Monocytes (%)                       | 6.69 $\pm$ 0.48     | 6.26 $\pm$ 0.38     | 6.63 $\pm$ 0.33    |
| Granulocytes (5)                    | 29.18 $\pm$ 1.83    | 28.53 $\pm$ 1.95    | 28.68 $\pm$ 1.26   |
| Lymphocytes ( $\times 10^9/L$ )     | 1.78 $\pm$ 0.15     | 2.14 $\pm$ 0.24     | 1.71 $\pm$ 0.40    |
| Monocytes ( $\times 10^9/L$ )       | 0.14 $\pm$ 0.01     | 0.13 $\pm$ 0.02     | 0.13 $\pm$ 0.05    |
| Granulocytes ( $\times 10^9/L$ )    | 0.92 $\pm$ 0.05     | 1.08 $\pm$ 0.12     | 0.91 $\pm$ 0.21    |
| Erythrocytes ( $\times 10^{12}/L$ ) | 3.10 $\pm$ 0.08     | 2.87 $\pm$ 0.09     | 2.90 $\pm$ 0.14    |
| Haemoglobin (g/L)                   | 8.75 $\pm$ 0.20     | 8.65 $\pm$ 0.25     | 8.38 $\pm$ 0.41    |
| Haematocrit (%)                     | 30.08 $\pm$ 0.76    | 29.25 $\pm$ 0.79    | 28.27 $\pm$ 1.43   |
| MCV (fL)                            | 97.81 $\pm$ 1.06    | 102.32 $\pm$ 1.56   | 97.81 $\pm$ 1.01   |
| MCH (pg)                            | 28.30 $\pm$ 0.53    | 30.21 $\pm$ 0.78    | 28.93 $\pm$ 0.54   |
| Platelets ( $\times 10^9/L$ )       | 400.85 $\pm$ 43.06  | 276.38 $\pm$ 46.82  | 311.92 $\pm$ 65.39 |
| Day 16                              |                     |                     |                    |
| Leucocytes ( $\times 10^9/L$ )      | 1.78 $\pm$ 0.12     | 2.05 $\pm$ 0.20     | 2.46 $\pm$ 0.29    |
| Lymphocytes (%)                     | 67.93 $\pm$ 1.01    | 66.81 $\pm$ 1.16    | 67.22 $\pm$ 1.54   |
| Monocytes (%)                       | 5.66 $\pm$ 0.25     | 5.95 $\pm$ 0.33     | 5.73 $\pm$ 0.42    |
| Granulocytes (5)                    | 26.42 $\pm$ 0.94    | 27.15 $\pm$ 1.19    | 27.05 $\pm$ 1.26   |
| Lymphocytes ( $\times 10^9/L$ )     | 1.15 $\pm$ 0.09     | 1.32 $\pm$ 0.13     | 1.58 $\pm$ 0.19    |
| Monocytes ( $\times 10^9/L$ )       | 0.05 $\pm$ 0.02     | 0.07 $\pm$ 0.02     | 0.09 $\pm$ 0.03    |
| Granulocytes ( $\times 10^9/L$ )    | 0.58 $\pm$ 0.04     | 0.66 $\pm$ 0.06     | 0.78 $\pm$ 0.09    |
| Erythrocytes ( $\times 10^{12}/L$ ) | 4.17 $\pm$ 0.09     | 3.71 $\pm$ 0.37     | 4.14 $\pm$ 0.06    |
| Haemoglobin (g/L)                   | 8.82 $\pm$ 0.24     | 7.65 $\pm$ 0.67     | 8.41 $\pm$ 0.22    |
| Haematocrit (%)                     | 28.29 $\pm$ 0.71    | 25.11 $\pm$ 2.47    | 27.48 $\pm$ 0.40   |
| MCV (fL)                            | 67.91 $\pm$ 0.73    | 68.47 $\pm$ 0.75    | 66.42 $\pm$ 0.47   |
| MCH (pg)                            | 20.89 $\pm$ 0.51    | 22.70 $\pm$ 2.46    | 20.24 $\pm$ 0.53   |
| Platelets ( $\times 10^9/L$ )       | 503.73 $\pm$ 50.17  | 645.70 $\pm$ 100.75 | 602.83 $\pm$ 53.93 |
